# Supplementary material
Source: publisher site journal article supplement (https://www.dovepress.com/article/456660)
Supplement: Supplementary file 1 [file get_supplementary_file.php]

Supplemental file 1. Table showing comparison of mean endothelial cell density loss at 6 months versus pre-op for the three machine study groups

| ECD Loss (%) | Signature Pro | Centurion | Quatera- 700 | p -value |
| --- | --- | --- | --- | --- |
| Soft Cataract group | | | | |
| Pre vs 2 weeks | 10.8% | 10.5% | 9.2% | 0.49 |
| Pre vs 6 months | 11.9% | 11.4% | 10.8% | 0.72 |
| Dense Cataract group | | | | |
| Pre vs 2 weeks | 11.3% | 11.5% | 11.0% | 0.98 |
| Pre vs 6 months | 14.5% | 14.6% | 14.1% | 0.95 |
